# Supplementary material for: Optimization of the Enzymatic Protein Hydrolysis of By-Products from Seabream (Sparus aurata) and Seabass (Dicentrarchus labrax), Chemical and Functional Characterization
Source: PubMed Central journal article supplement (PMC7589672; doi:10.3390/foods9101503), 2020-10-20
Supplement: foods-09-01503-s001.pdf [file foods-09-01503-s001.pdf]

**Table S1.** Experimental domain and coding of the independent variables in the factorial design executed to study the joint effect of pH and temperature on the Alcalase hydrolysis of seabream and seabass heads.

| Coded values | Natural values |        |
|--------------|----------------|--------|
|              | pH             | T (°C) |
| -1.41        | 6.0            | 30.0   |
| -1           | 6.6            | 37.3   |
| 0            | 8.0            | 55.0   |
| +1           | 9.4            | 72.7   |
| +1.41        | 10.0           | 80.0   |

Codification:  $V_c = (V_n - V_0) / \Delta V_n$   
Decodification:  $V_n = V_0 + (\Delta V_n \times V_c)$   
 $V_n$  = natural value of the variable to codify  
 $\Delta V_n$  = increment of  $V_n$  for unit of  $V_c$   
 $V_0$  = natural value in the centre of the domain  
 $V_c$  = codified value of the variable

**Constant conditions**  
Agitation= 200 rpm  
r (S:L)= 1:1  
[Alcalase]= 0.5% (v/w) or 12 AU/kg of heads  
time of hydrolysis= 3 h

**Table S2.** Fatty acids content (as % of total fatty acids) in the fish oils recovered from Sb\_He, Sb\_FT, Sb\_Vis, Sbass\_He, Sbass\_FT and Sbass\_Vis, complementary to the production of FPHs. Errors are the confidence intervals for n=2 (samples from independent hydrolysates) and  $\alpha=0.05$ .

| Formula         | Fatty acids                  | Sb_He      | Sb_FT      | Sb_Vis     | Sbass_He   | Sbass_FT   | Sbass_Vis  |
|-----------------|------------------------------|------------|------------|------------|------------|------------|------------|
| <b>C8:0</b>     | Caprylic acid                | 0.07±0.04  | 0.08±0.03  | 0.08±0.02  | 0.07±0.05  | 0.17±0.06  | 0.08±0.02  |
| <b>C10:0</b>    | Capric acid                  | 0.08±0.02  | 0.10±0.02  | 0.11±0.03  | 0.09±0.02  | 0.21±0.05  | 0.09±0.04  |
| <b>C11:0</b>    | Undecanoic acid              | 0.04±0.01  | 0.05±0.02  | 0.05±0.02  | 0.04±0.02  | 0.10±0.03  | 0.05±0.01  |
| <b>C12:0</b>    | Lauric acid                  | 0.12±0.04  | 0.14±0.06  | 0.16±0.07  | 0.13±0.08  | 0.28±0.10  | 0.15±0.05  |
| <b>C13:0</b>    | Tridecanoic acid             | 0.06±0.02  | 0.07±0.02  | 0.08±0.03  | 0.07±0.01  | 0.13±0.06  | 0.07±0.02  |
| <b>C14:0</b>    | Myristic acid                | 2.42±0.42  | 2.51±0.28  | 2.62±0.19  | 2.76±0.63  | 2.58±0.57  | 2.60±0.70  |
| <b>C14:1</b>    | Myristoleic acid             | 0.11±0.02  | 0.10±0.01  | 0.14±0.05  | 0.09±0.06  | 0.20±0.08  | 0.12±0.05  |
| <b>C15:0</b>    | Pentadecanoic acid           | 0.32±0.06  | 0.34±0.05  | 0.33±0.07  | 0.34±0.08  | 0.31±0.02  | 0.26±0.07  |
| <b>C16:0</b>    | Palmitic acid                | 15.36±0.90 | 15.21±0.58 | 15.27±0.49 | 14.73±1.35 | 13.22±0.98 | 13.59±1.01 |
| <b>C16:1n7c</b> | Palmitoleic acid             | 4.45±0.40  | 4.24±0.35  | 5.66±0.62  | 4.59±0.88  | 4.94±0.47  | 4.89±0.56  |
| <b>C17:0</b>    | Heptadecanoic acid           | 0.52±0.09  | 0.55±0.08  | 0.52±0.03  | 0.55±0.04  | 0.38±0.05  | 0.40±0.06  |
| <b>C18:0</b>    | Stearic acid                 | 2.41±0.23  | 2.98±0.19  | 3.06±0.36  | 3.13±0.62  | 2.68±0.11  | 2.59±0.24  |
| <b>C18:1n9c</b> | Oleic acid                   | 28.59±0.69 | 28.68±0.93 | 37.73±1.25 | 31.65±2.69 | 33.60±0.98 | 34.69±0.85 |
| <b>C18:2n6c</b> | Linoleic acid                | 21.28±0.41 | 21.90±0.50 | 15.74±0.60 | 23.50±0.95 | 22.22±1.14 | 21.34±0.59 |
| <b>C20:0</b>    | Arachidic acid               | 0.27±0.20  | 0.30±0.14  | 0.37±0.09  | 0.32±0.08  | 0.45±0.10  | 0.31±0.04  |
| <b>C18:3n6</b>  | -Linolenic acid              | 0.25±0.07  | 0.24±0.06  | 0.19±0.05  | 0.24±0.10  | 0.33±0.06  | 0.22±0.02  |
| <b>C18:3n3</b>  | Linolenic acid               | 3.08±0.09  | 3.14±0.19  | 2.75±0.34  | 3.04±0.86  | 3.85±0.50  | 4.11±0.80  |
| <b>C20:1n9</b>  | Eicosenoic acid              | 1.66±0.50  | 1.79±0.43  | 1.84±0.30  | 2.08±0.39  | 1.70±0.18  | 1.94±0.27  |
| <b>C21:0</b>    | Henicosanoic acid            | 0.06±0.01  | 0.06±0.03  | 0.08±0.04  | 0.06±0.03  | 0.13±0.07  | 0.07±0.02  |
| <b>C20:2n6</b>  | Eicosadienoic acid           | 0.91±0.09  | 0.94±0.09  | 0.55±0.05  | 1.01±0.18  | 0.84±0.08  | 0.84±0.07  |
| <b>C22:0</b>    | Docosanoic acid              | 0.14±0.02  | 0.17±0.03  | 0.22±0.03  | 0.17±0.07  | 0.30±0.09  | 0.18±0.03  |
| <b>C20:3n6</b>  | Dihomo-linolenic acid (DGLA) | 0.16±0.05  | 0.17±0.03  | 0.22±0.06  | 0.17±0.07  | 0.32±0.08  | 0.26±0.05  |
| <b>C20:3n3</b>  | Eicosatrienoic acid          | 0.23±0.03  | 0.25±0.04  | 0.32±0.06  | 0.25±0.08  | 0.47±0.12  | 0.47±0.10  |
| <b>C22:1n9</b>  | Erucic acid                  | 0.20±0.02  | 0.22±0.03  | 0.43±0.05  | 0.25±0.09  | 0.43±0.09  | 0.43±0.07  |
| <b>C20:4n6</b>  | Arachidonic acid             | 0.61±0.12  | 0.56±0.10  | 0.55±0.08  | 0.47±0.16  | 0.42±0.06  | 0.38±0.09  |
| <b>C23:0</b>    | Tricosanoic acid             | 0.04±0.01  | 0.05±0.03  | 0.06±0.02  | 0.05±0.03  | 0.09±0.02  | 0.05±0.03  |

|                |                             |            |            |           |           |           |           |
|----------------|-----------------------------|------------|------------|-----------|-----------|-----------|-----------|
| <b>C21:4n3</b> | Heneicosatetraenoic acid    | 0.61±0.18  | 0.68±0.20  | 0.76±0.12 | 0.62±0.26 | 1.23±0.17 | 0.85±0.19 |
| <b>C22:2n6</b> | Docosadienoic acid          | 0.09±0.03  | 0.10±0.02  | 0.13±0.04 | 0.09±0.02 | 0.23±0.06 | 0.16±0.02 |
| <b>C20:5n3</b> | Eicosapentaenoic acid (EPA) | 4.80±0.63  | 4.51±0.51  | 2.46±0.24 | 3.24±0.71 | 2.76±0.19 | 3.06±0.49 |
| <b>C24:0</b>   | Lignoceric acid             | 0.09±0.01  | 0.11±0.03  | 0.13±0.04 | 0.11±0.02 | 0.19±0.03 | 0.11±0.03 |
| <b>C24:1n9</b> | Nervonic acid               | 0.24±0.20  | 0.26±0.19  | 0.50±0.34 | 0.28±0.19 | 0.41±0.22 | 0.37±0.17 |
| <b>C22:6n3</b> | Docosahexaenoic acid (DHA)  | 10.72±0.56 | 9.50±0.38  | 6.88±0.50 | 5.78±0.63 | 4.82±0.14 | 5.26±0.29 |
|                | <b>DHA+EPA (%)</b>          | 15.51±0.69 | 14.00±0.53 | 9.34±0.72 | 9.02±1.08 | 7.57±0.30 | 8.31±0.82 |
|                | <b>r: ω-3 / ω-6</b>         | 0.83±0.08  | 0.76±0.09  | 0.76±0.07 | 0.51±0.09 | 0.54±0.05 | 0.59±0.09 |

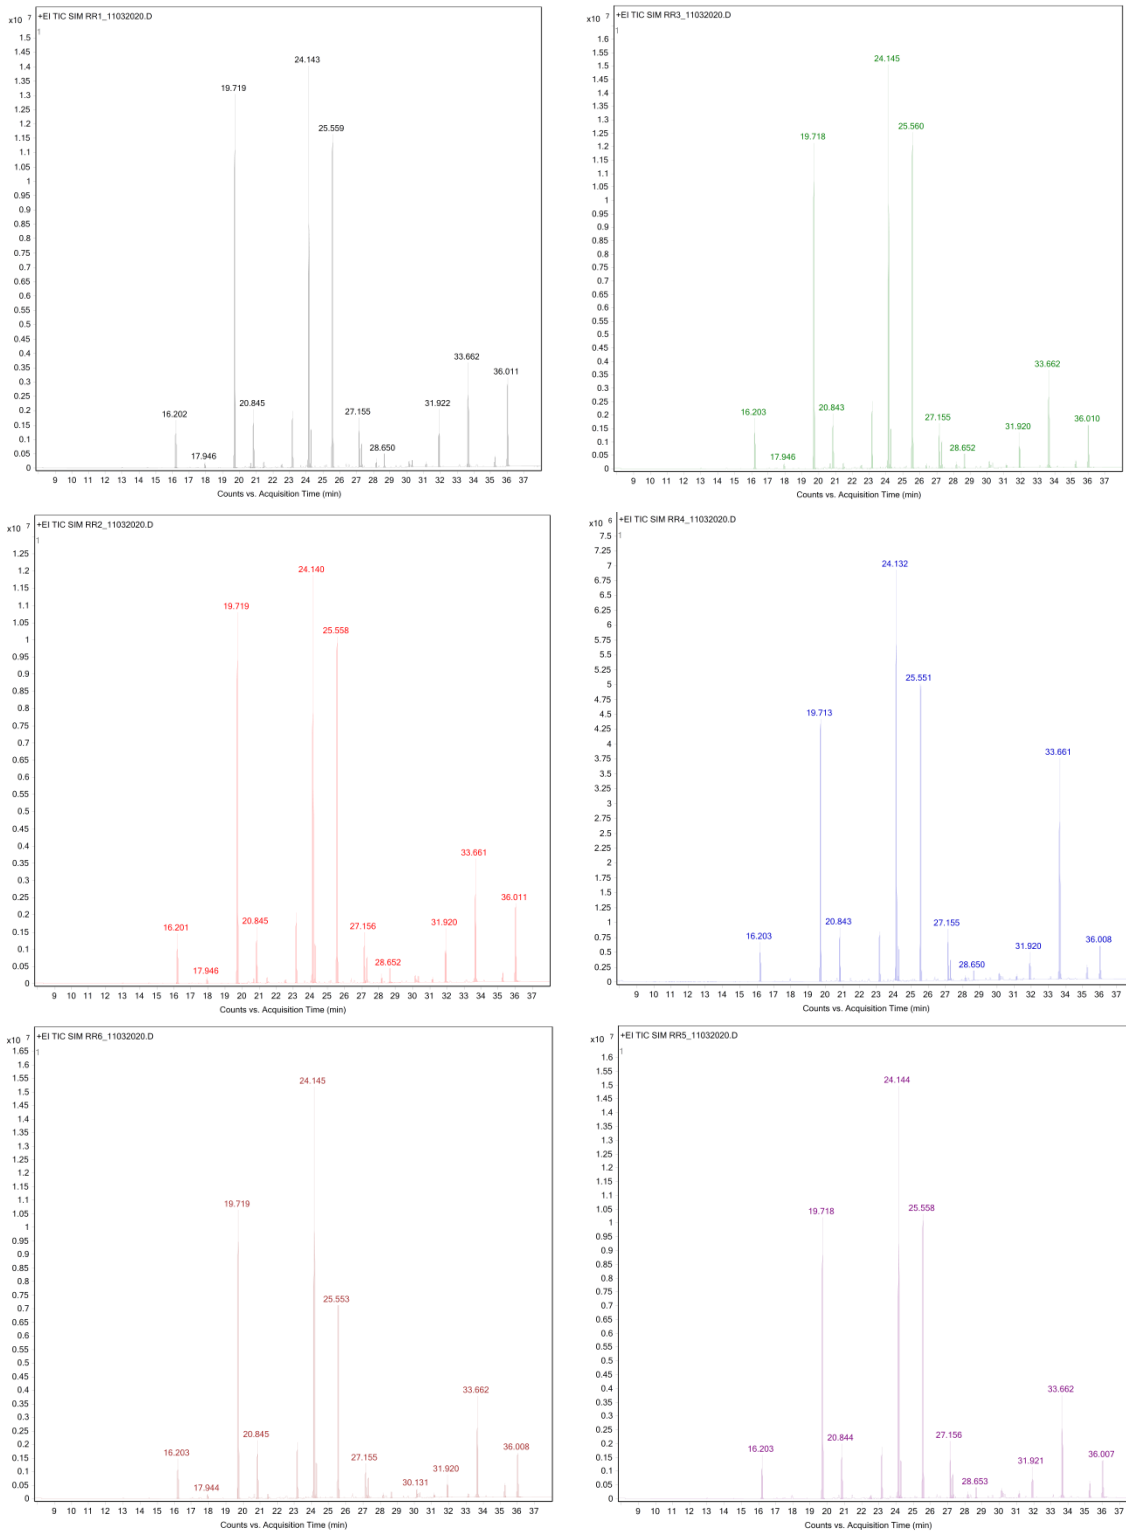

**Figure S1.** GC-MS chromatograms of oil extracted from Sb\_He (top left), Sb\_FT (middle left), Sb\_Vis (bottom left), Sboss\_He (top right), Sboss\_FT (middle right) and Sboss\_Vis (bottom right).
